# Supplementary material for: Selective and efficient detection of Pb2+ in aqueous solution by lanthanoid-organic frameworks bearing pyridine-3,4-dicarboxylic acid and glutaric acid
Source: Royal Society of Chemistry journal article supplement (doi:10.1039/d3ce00099k), 2023-01-01
Supplement: d3ce00099k1.pdf [file d3ce00099k1.pdf]

**Supplementary Information**

**Selective and efficient detection of Pb<sup>2+</sup> in aqueous solution by lanthanoids-organic frameworks bearing Pyridine-3, 4-dicarboxylic acid and glutaric acid**

Zaib ul Nisa<sup>a</sup>, Nargis Akhter Ashashi<sup>a</sup>, Richa Singhaal<sup>a</sup>, Musheer Ahmad<sup>b</sup>, Rosa M. Gomila<sup>c</sup>,  
Antonio Frontera<sup>c</sup>, Haq Nawaz Sheikh<sup>a,\*</sup>

<sup>a</sup>Department of Chemistry, University of Jammu, Baba Sahib Ambedkar Road, Jammu 180006,  
India

<sup>b</sup>Department of Applied Chemistry, Faculty of Engineering & Technology, Aligarh Muslim  
University, Aligarh, 202002, India

<sup>c</sup>Department of Chemistry, Universitat de les Illes Balears, Crts de Valldemossa km 7.5, 07122  
Palma de Mallorca, Balears, Spain

| <b>CONTENTS</b>                                                        | <b>Page Number</b> |
|------------------------------------------------------------------------|--------------------|
| 1. X-Ray Crystal structures of MOFs 1-5.....                           | S2-S7              |
| 2. Characterization by FTIR, PXRD, HSA, TGA/dTG, BET.....              | S8-S14             |
| 3. Crystallographic Information (Tables).....                          | S13-S23            |
| 4. PreviousMOF-based sensors for Pb <sup>2+</sup> detection Table..... | S24                |
| 5. Stern -Volmer Constants, Quenching Efficiencies and LODs Table....  | S24                |

### 1. X-Ray Crystal structures of Ln-MOFs 1-5

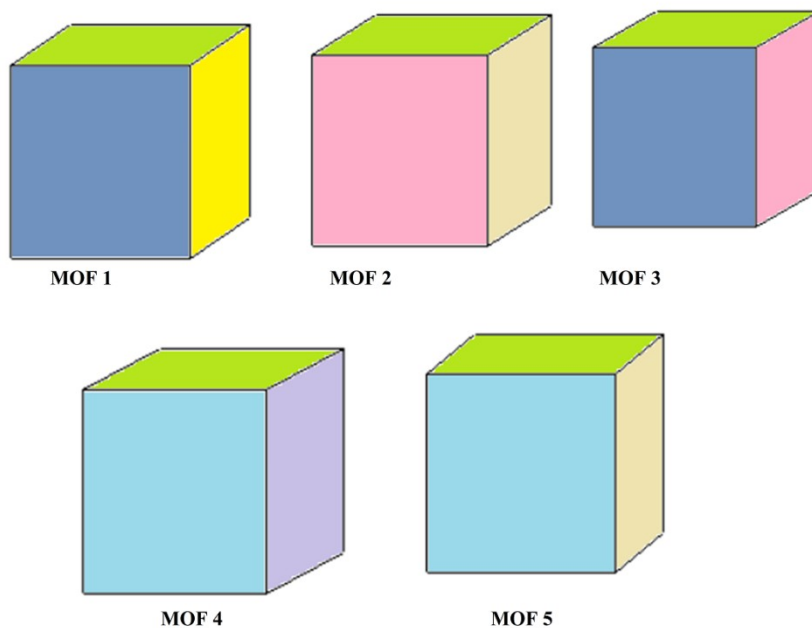

**Figure S1.** Shape of MOFs analyzed by Shape software

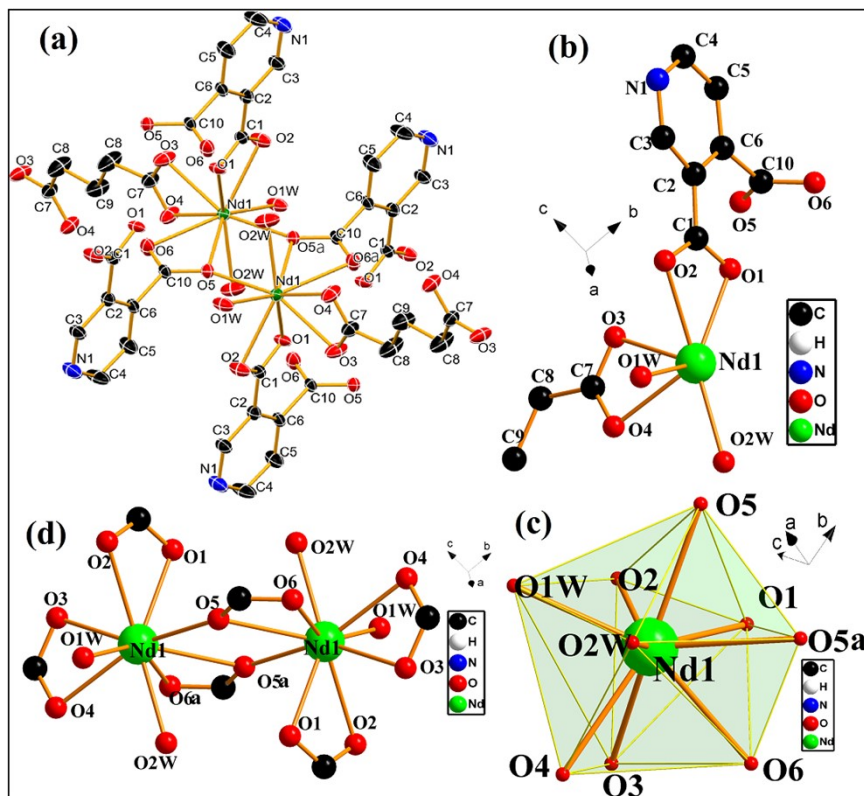

**Fig. S2** Pictographic representation of the crystal structure of Ln-MOF 2; (a) ORTEP view of the structural unit (the thermal displacement ellipsoids are drawn at 50% probability; H atoms are omitted for structural clarity); (b) Asymmetric unit of MOF 2 showing the coordination environment at the Nd site (guest solvent molecules are omitted for clarity); (c) MFF (muffin) polyhedral geometry around the Nd1 center (d) Representation of dinuclear Nd<sub>2</sub>O<sub>16</sub> SBU of Ln-MOF2

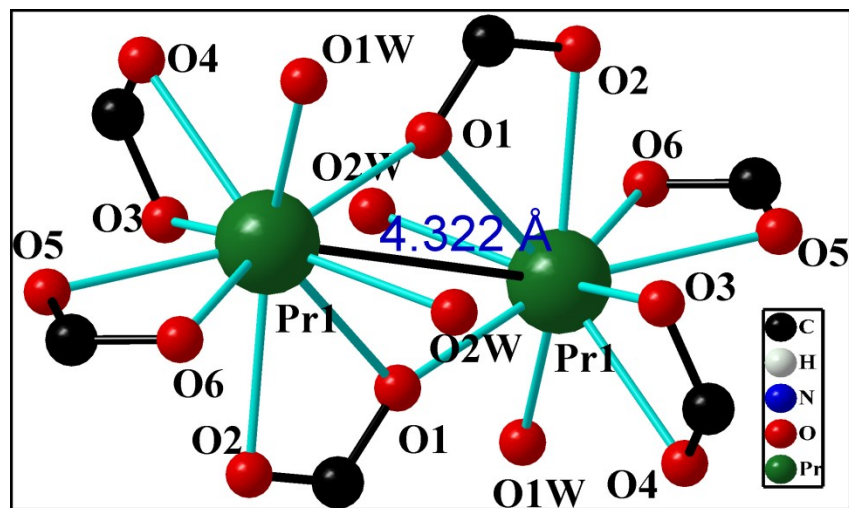

**Figure S3.** SBU of MOF 1(Pr...Pr = 4.322 Å)

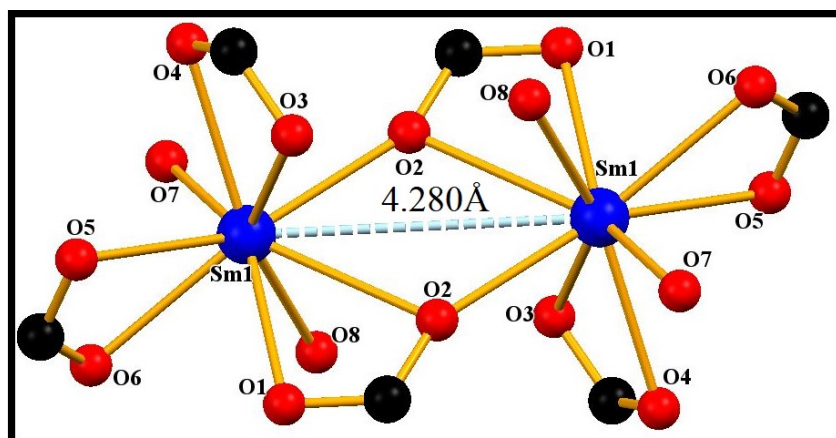

Figure S4. SBU of MOF 3 (Sm...Sm = 4.280 Å)

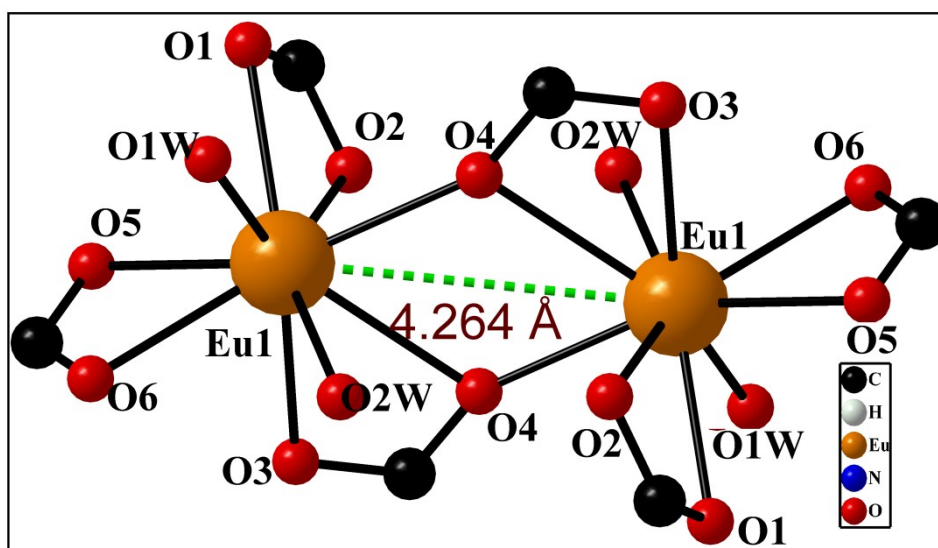

**Figure S5.** SBU of MOF 4 (Eu...Eu = 4.264 Å)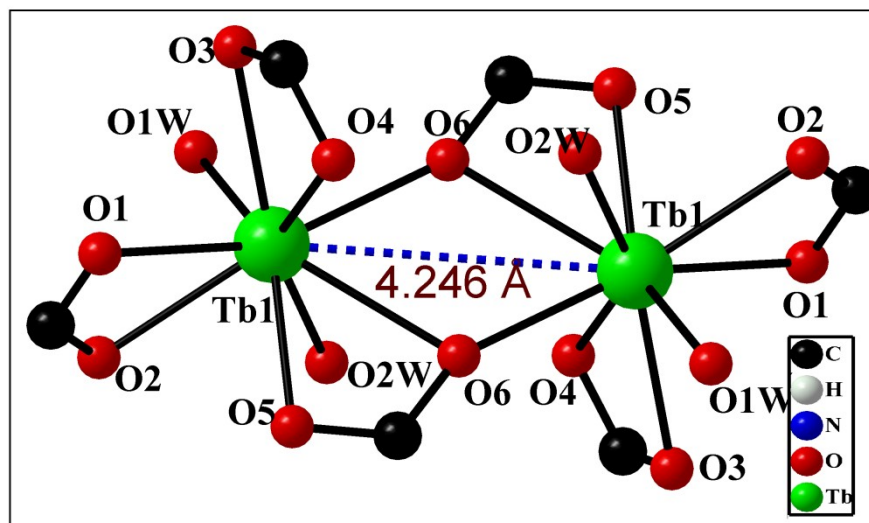**Figure S6.** SBU of MOF 5 (Tb...Tb = 4.246 Å)

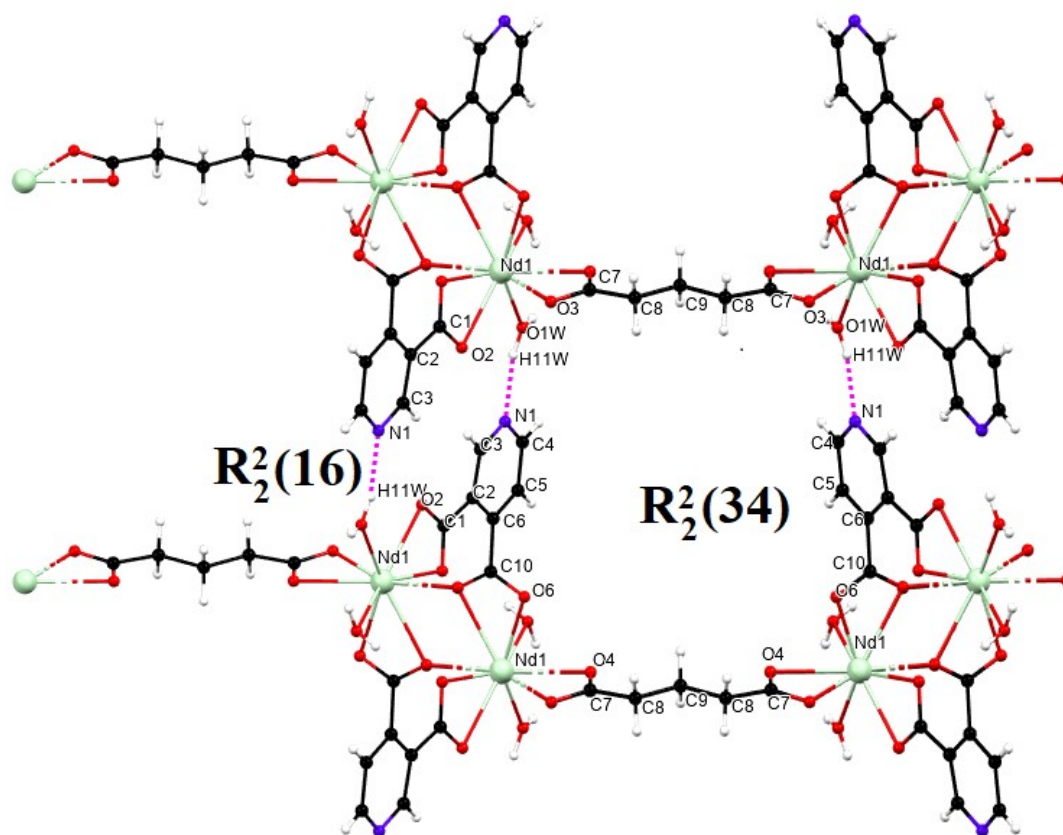

**Figure S6.** Presentation of the anionic portion of MOF **2** along the a-axis showing the  $R_2^2$  (34) and  $R_2^2$  (16) synthons.

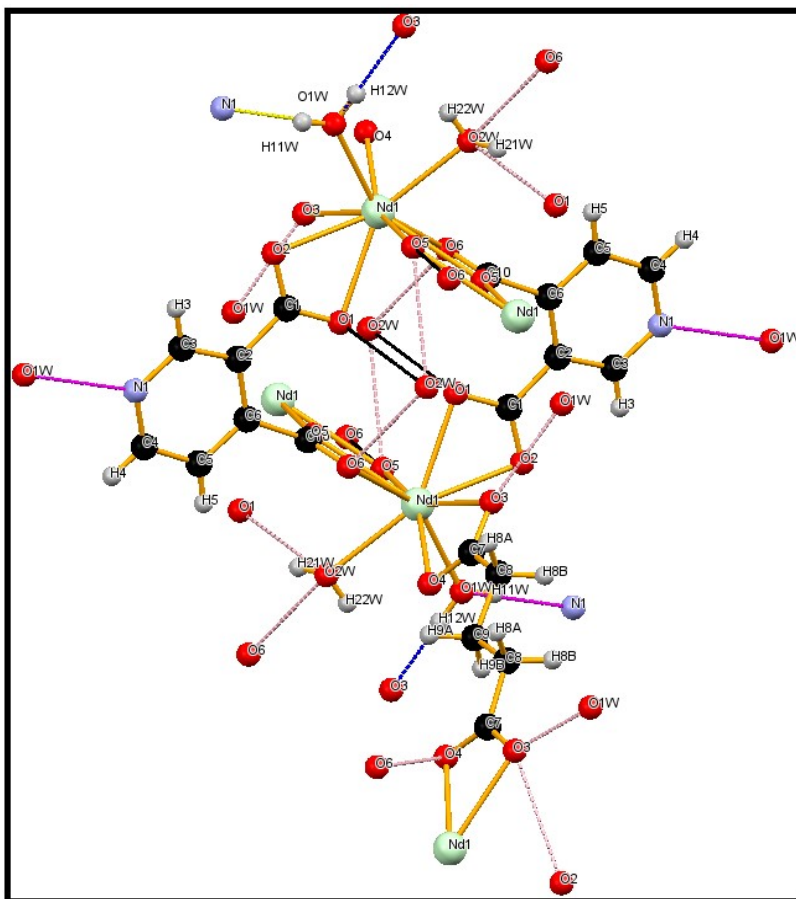

**Figure S7.** Hydrogen bonding position of MOF2

## 2. Characterization by FTIR, PXRD, HSA, TGA

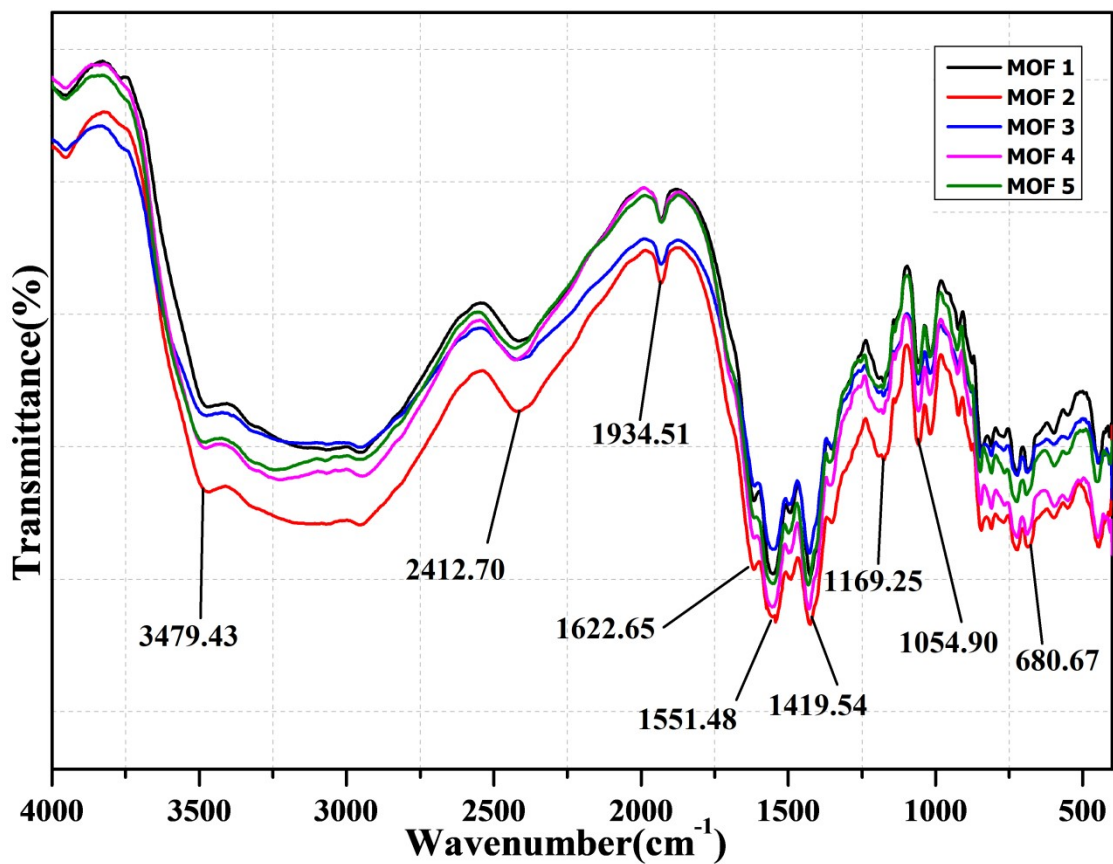

Figure S8. FTIR spectra of MOFs 1-5



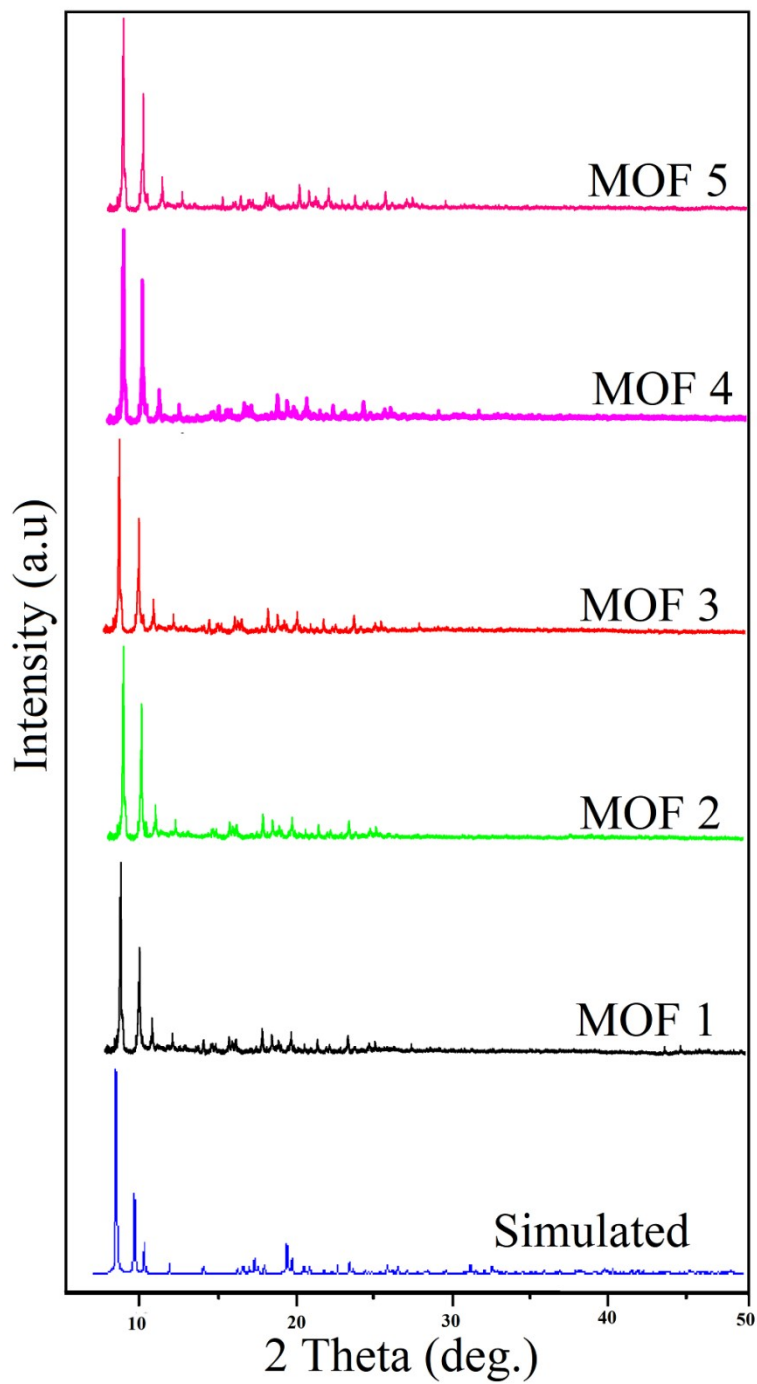

**Figure S9.** Experimental and simulated PXRD Patterns MOFs1-5

## Thermogravimetric analysis

The obtained TGA curves, shown in Fig. S9-S10, suggest that complexes have typically four steps weight loss of as-prepared MOFs sample with increasing temperature. The first mass loss is about 5.62% (calculated 5.70%) below 135 °C, which can be attributed to the removal of one coordinated water molecule. The second weight loss between 135 and 325 °C is 5.67% (calculated 6.67%) resulting from the loss of second coordinated water molecule. With the increasing temperature, the mass loss of step three is 25.63% from 325 C to 460 °C may be attributed to the loss of oxygen containing ligands and then decomposition of aromatic rings in fourth step. In addition, a temperature of 500 °C was found to be enough to remove all the organic frameworks and form metal oxides.<sup>1-3</sup>

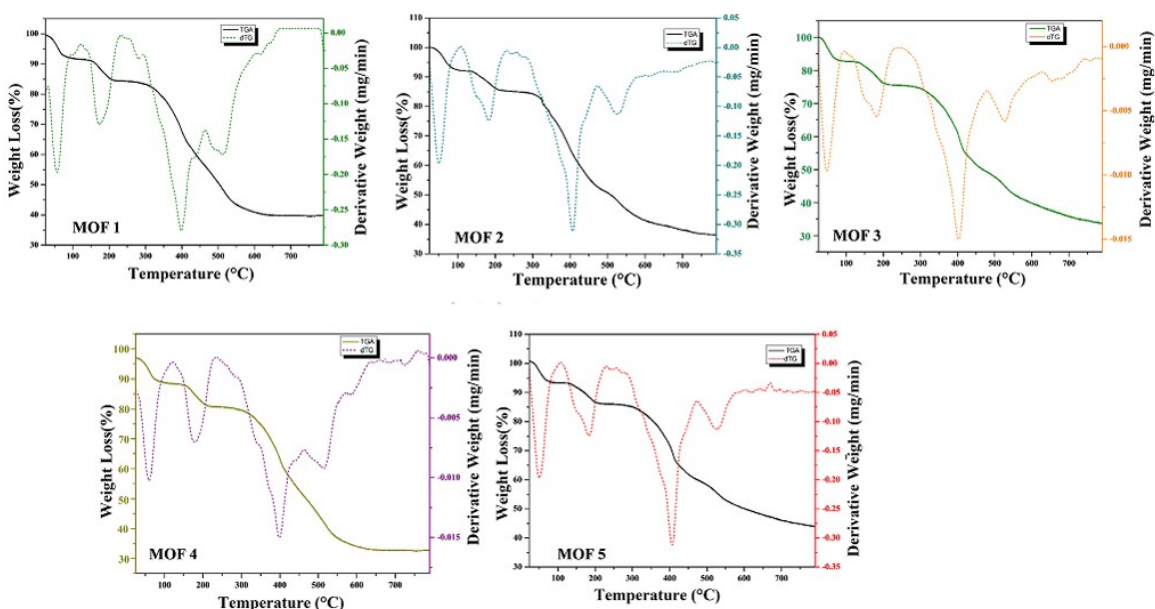

**Figure S10.** TGA curve and dTG curves for MOF 1-MOF 5

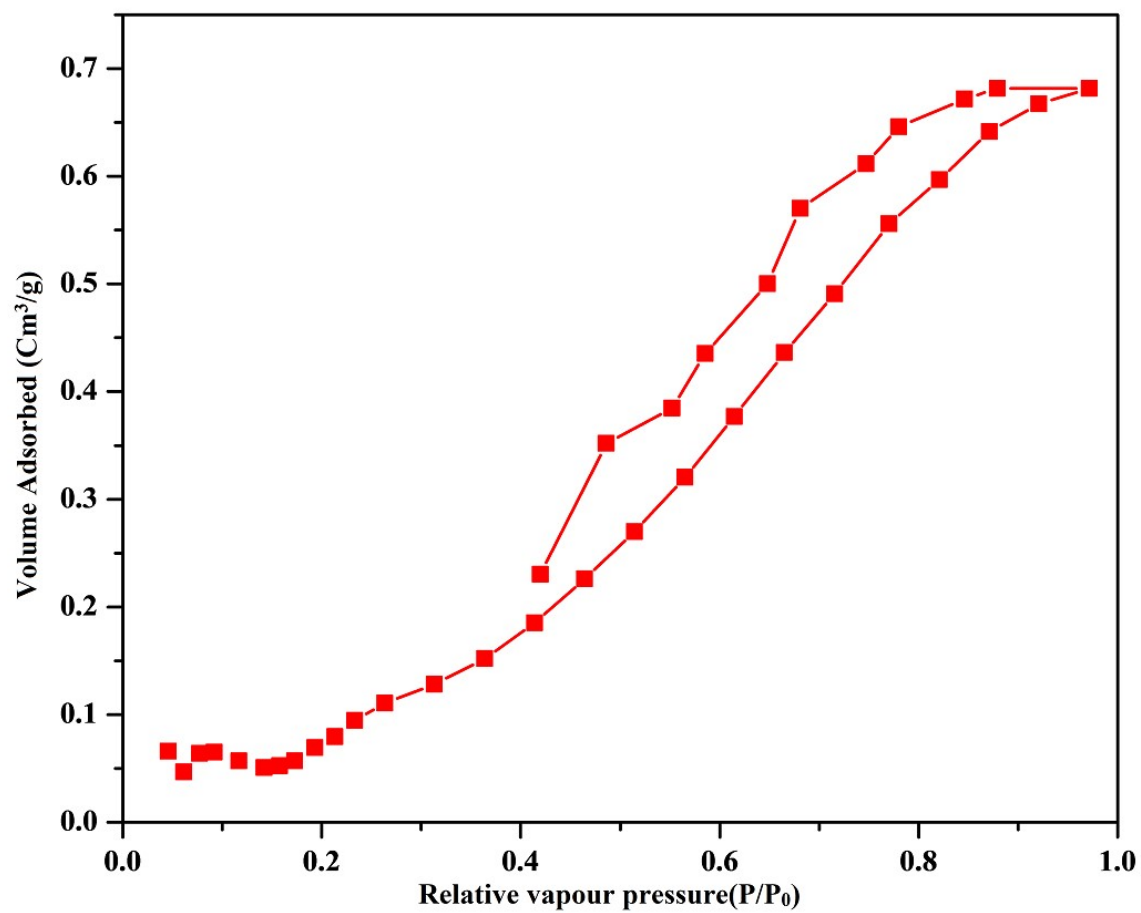

**Figure S11.** Nitrogen gas sorption isotherm at 77K for the activated Ln-MOF 2

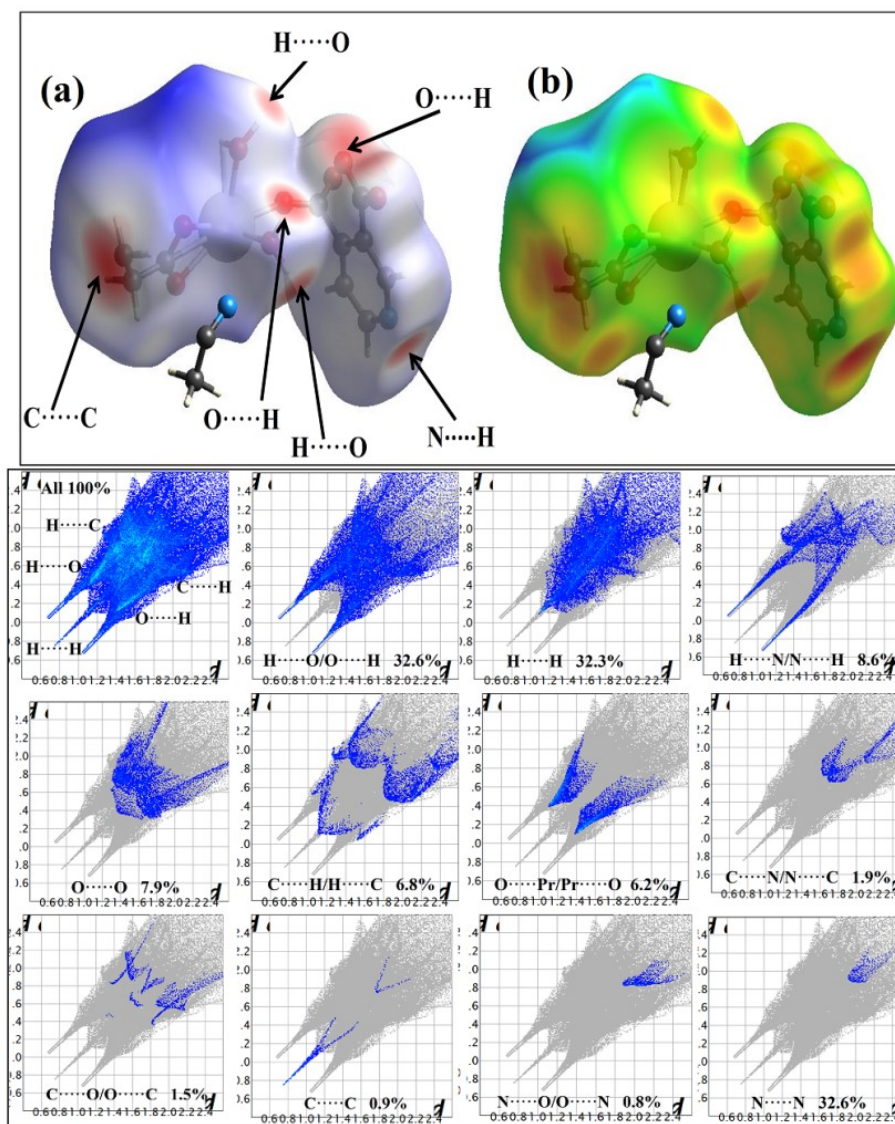

**Figure S12.** The semitransparent HSA drawn on fragments of MOF1 (a) mapped with the  $d_{\text{norm}}$  (left) function (b)  $d_e$  (right). Regions of the most important intermolecular contacts are indicated with arrows. Redovals indicate regions in which HS are “perforated” by coordination bonds. Fingerprint plots of MOF1 showing the percentages of contacts to the total Hirshfeld surface area of molecules

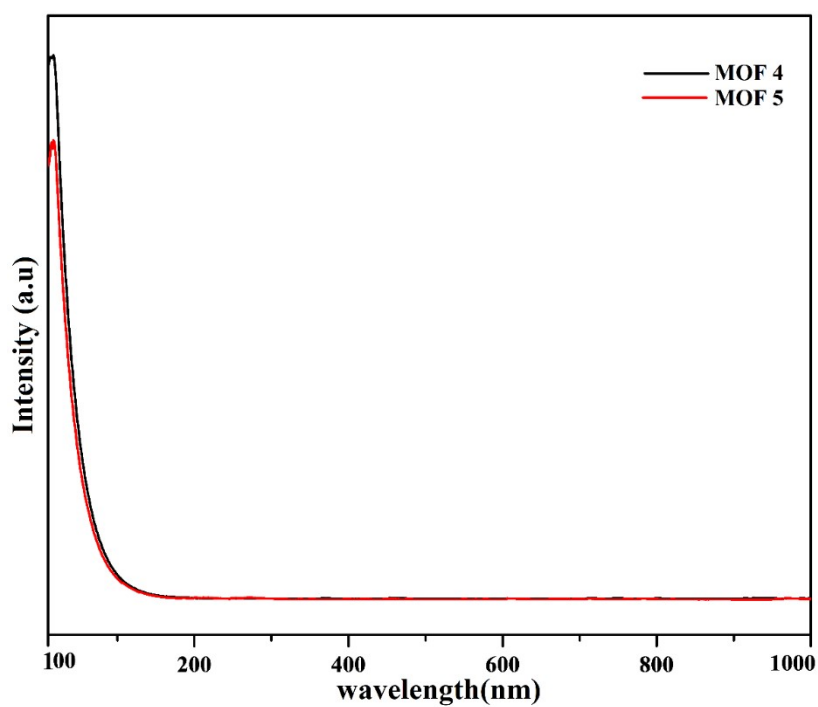

Figure S13. Lifetime curves of MOFs 4 and 5

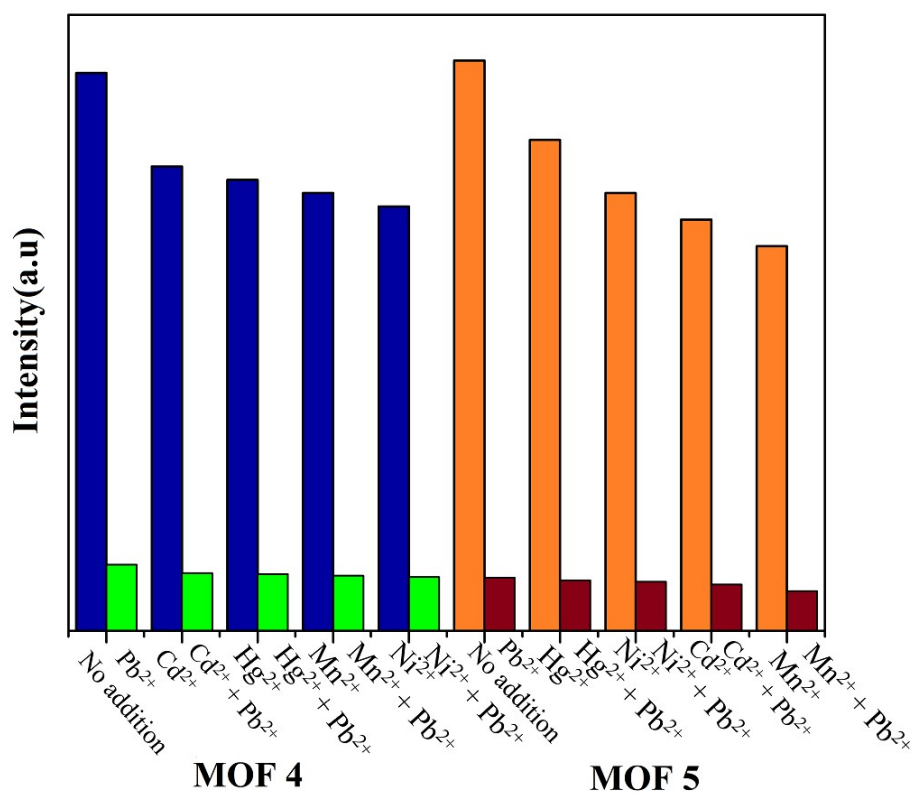

Figure S13. Selectivity experiment for  $Pb^{2+}$  in the presence of other metal ions for MOF 4 and MOF 5.

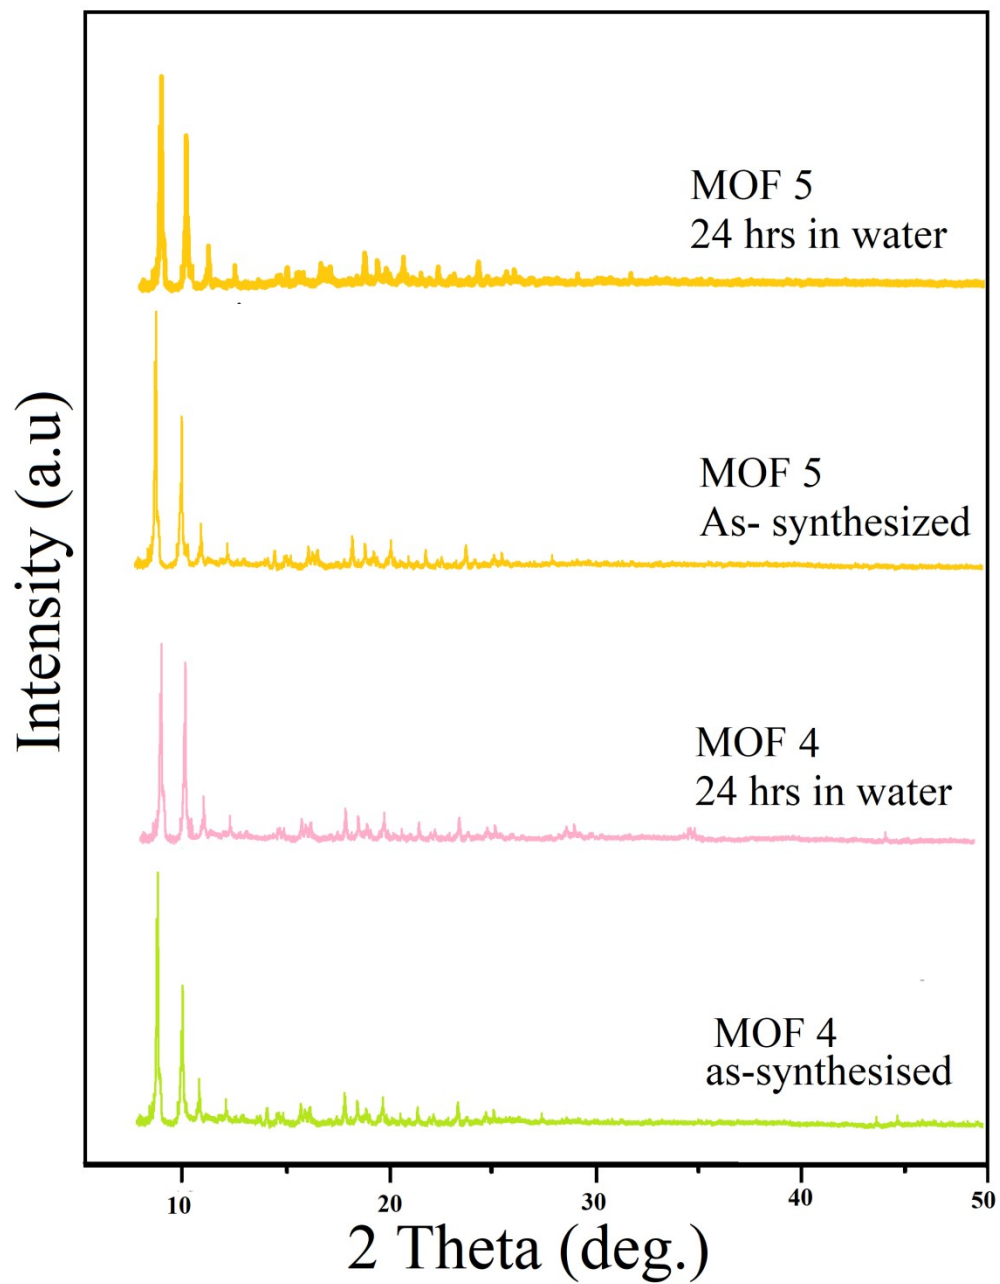

**Figure S13.** PXRD patterns of MOFs 4 and 5 as-synthesized and in water after 24 h

### 3. Crystallographic Information (Tables)

Table S1. Selected Bond lengths (Å) for MOF 1.

|                      |           |                      |           |
|----------------------|-----------|----------------------|-----------|
| O1—Pr1               | 2.464 (5) | O2W—Pr1              | 2.477 (5) |
| O1—Pr1 <sup>i</sup>  | 2.661 (5) | O4—Pr1 <sup>ii</sup> | 2.539 (5) |
| O2—Pr1 <sup>i</sup>  | 2.553 (5) | O5—Pr1               | 2.496 (5) |
| O1W—Pr1              | 2.401 (4) | O6—Pr1               | 2.516 (6) |
| O3—Pr1 <sup>ii</sup> | 2.495 (5) |                      |           |

Symmetry code(s): (i)  $-x+2, -y+1, -z+1$ ; (ii)  $x-1, y, z$ .

Table S2. Selected Bond angles (Å) for MOF 1.

|                           |             |                                          |             |
|---------------------------|-------------|------------------------------------------|-------------|
| O1W—Pr1—O1                | 84.50 (19)  | O3 <sup>iii</sup> —Pr1—O4 <sup>iii</sup> | 51.98 (14)  |
| O1W—Pr1—O2W               | 75.87 (18)  | O5—Pr1—O4 <sup>iii</sup>                 | 74.46 (19)  |
| O1—Pr1—O2W                | 80.3 (2)    | O6—Pr1—O4 <sup>iii</sup>                 | 113.85 (18) |
| O1W—Pr1—O3 <sup>iii</sup> | 126.89 (16) | O1W—Pr1—O2 <sup>i</sup>                  | 147.2 (2)   |
| O1—Pr1—O3 <sup>iii</sup>  | 78.09 (15)  | O1—Pr1—O2 <sup>i</sup>                   | 114.75 (15) |
| O2W—Pr1—O3 <sup>iii</sup> | 146.23 (18) | O2W—Pr1—O2 <sup>i</sup>                  | 81.4 (2)    |
| O1W—Pr1—O5                | 99.5 (2)    | O3 <sup>iii</sup> —Pr1—O2 <sup>i</sup>   | 84.43 (16)  |
| O1—Pr1—O5                 | 152.71 (16) | O5—Pr1—O2 <sup>i</sup>                   | 75.75 (19)  |
| O2W—Pr1—O5                | 126.9 (2)   | O6—Pr1—O2 <sup>i</sup>                   | 73.02 (18)  |

|                           |             |                                        |             |
|---------------------------|-------------|----------------------------------------|-------------|
| O3 <sup>iii</sup> —Pr1—O5 | 78.05 (17)  | O4 <sup>iii</sup> —Pr1—O2 <sup>i</sup> | 131.07 (17) |
| O1W—Pr1—O6                | 78.9 (2)    | O1W—Pr1—O1 <sup>i</sup>                | 138.65 (16) |
| O1—Pr1—O6                 | 154.23 (15) | O1—Pr1—O1 <sup>i</sup>                 | 65.07 (16)  |
| O2W—Pr1—O6                | 76.6 (2)    | O2W—Pr1—O1 <sup>i</sup>                | 72.08 (17)  |
| O3 <sup>iii</sup> —Pr1—O6 | 127.68 (16) | O3 <sup>iii</sup> —Pr1—O1 <sup>i</sup> | 75.37 (14)  |
| O5—Pr1—O6                 | 51.12 (16)  | O5—Pr1—O1 <sup>i</sup>                 | 120.55 (18) |
| O1W—Pr1—O4 <sup>iii</sup> | 75.94 (16)  | O6—Pr1—O1 <sup>i</sup>                 | 117.18 (17) |
| O1—Pr1—O4 <sup>iii</sup>  | 80.48 (17)  | O4 <sup>iii</sup> —Pr1—O1 <sup>i</sup> | 122.04 (16) |
| O2W—Pr1—O4 <sup>iii</sup> | 147.1 (2)   | O2 <sup>i</sup> —Pr1—O1 <sup>i</sup>   | 49.70 (15)  |

---

Symmetry code(s): (i)  $-x+2, -y+1, -z+1$ ; (ii)  $x-1, y, z$ ; (iii)  $x+1, y, z$ .

Table S3. Selected Bond lengths (Å) for MOF 2.

|         |           |                      |           |
|---------|-----------|----------------------|-----------|
| O1—Nd1  | 2.481 (6) | O4—Nd1               | 2.503 (7) |
| O2—Nd1  | 2.528 (6) | O5—Nd1 <sup>i</sup>  | 2.453 (6) |
| O1W—Nd1 | 2.393 (6) | O5—Nd1 <sup>ii</sup> | 2.645 (6) |
| O3—Nd1  | 2.481 (7) | O6—Nd1 <sup>ii</sup> | 2.538 (6) |
| O2W—Nd1 | 2.457 (7) |                      |           |

---

Symmetry code(s): (i)  $x-1, y, z$ ; (ii)  $-x+1, -y, -z+1$ .

Table S4. Selected Bond angles (Å) for MOF 2.

|                                        |           |           |            |
|----------------------------------------|-----------|-----------|------------|
| Nd1 <sup>i</sup> —O5—Nd1 <sup>ii</sup> | 115.1 (2) | O1—Nd1—O2 | 52.34 (19) |
|----------------------------------------|-----------|-----------|------------|



|                            |           |                                         |            |
|----------------------------|-----------|-----------------------------------------|------------|
| O1W—Nd1—O5 <sup>iii</sup>  | 84.4 (2)  | O3—Nd1—O2                               | 74.3 (2)   |
| O1W—Nd1—O2W                | 76.2 (2)  | O4—Nd1—O2                               | 114.0 (2)  |
| O5 <sup>iii</sup> —Nd1—O2W | 80.1 (3)  | O1W—Nd1—O6 <sup>ii</sup>                | 147.5 (3)  |
| O1W—Nd1—O1                 | 127.1 (2) | O5 <sup>iii</sup> —Nd1—O6 <sup>ii</sup> | 114.8 (2)  |
| O5 <sup>iii</sup> —Nd1—O1  | 78.5 (2)  | O2W—Nd1—O6 <sup>ii</sup>                | 81.4 (3)   |
| O2W—Nd1—O1                 | 145.9 (2) | O1—Nd1—O6 <sup>ii</sup>                 | 83.9 (2)   |
| O1W—Nd1—O3                 | 99.2 (3)  | O3—Nd1—O6 <sup>ii</sup>                 | 76.1 (3)   |
| O5 <sup>iii</sup> —Nd1—O3  | 152.5 (2) | O4—Nd1—O6 <sup>ii</sup>                 | 73.4 (2)   |
| O2W—Nd1—O3                 | 127.3 (3) | O2—Nd1—O6 <sup>ii</sup>                 | 131.1 (2)  |
| O1—Nd1—O3                  | 77.8 (2)  | O1W—Nd1—O5 <sup>ii</sup>                | 138.6 (2)  |
| O1W—Nd1—O4                 | 78.7 (3)  | O5 <sup>iii</sup> —Nd1—O5 <sup>ii</sup> | 64.9 (2)   |
| O5 <sup>iii</sup> —Nd1—O4  | 153.8 (2) | O2W—Nd1—O5 <sup>ii</sup>                | 71.9 (2)   |
| O2W—Nd1—O4                 | 76.5 (3)  | O1—Nd1—O5 <sup>ii</sup>                 | 75.06 (19) |
| O1—Nd1—O4                  | 127.8 (2) | O3—Nd1—O5 <sup>ii</sup>                 | 121.0 (2)  |
| O3—Nd1—O4                  | 51.6 (2)  | O4—Nd1—O5 <sup>ii</sup>                 | 117.6 (2)  |
| O1W—Nd1—O2                 | 75.8 (2)  | O2—Nd1—O5 <sup>ii</sup>                 | 121.8 (2)  |
| O5 <sup>iii</sup> —Nd1—O2  | 80.4 (2)  | O6 <sup>ii</sup> —Nd1—O5 <sup>ii</sup>  | 49.87 (19) |
| O2W—Nd1—O2                 | 147.1 (3) |                                         |            |

Symmetry code(s): (i)  $x-1, y, z$ ; (ii)  $-x+1, -y, -z+1$ ; (iii)  $x+1, y, z$ .

Table S5. Selected Bond lengths (Å) for MOF 3.

|        |           |        |           |
|--------|-----------|--------|-----------|
| Sm1—O1 | 2.506 (5) | Sm1—O5 | 2.466 (6) |
|--------|-----------|--------|-----------|

|                     |           |        |           |
|---------------------|-----------|--------|-----------|
| Sm1—O2 <sup>i</sup> | 2.421 (5) | Sm1—O6 | 2.486 (6) |
| Sm1—O2              | 2.648 (5) | Sm1—O7 | 2.374 (5) |
| Sm1—O3              | 2.452 (5) | Sm1—O8 | 2.427 (6) |
| Sm1—O4              | 2.498 (6) |        |           |

Symmetry code(s): (i)  $-x+1, -y+1, -z+2$ .

Table S6. Selected Bond angles (°) for MOF 3.

|                         |             |                        |             |
|-------------------------|-------------|------------------------|-------------|
| O2—Sm1—O1               | 50.02 (16)  | O6—Sm1—O4              | 114.2 (2)   |
| O2 <sup>i</sup> —Sm1—O1 | 114.87 (17) | O6—Sm1—O5              | 51.51 (18)  |
| O3—Sm1—O1               | 84.22 (18)  | O7—Sm1—O1              | 146.6 (2)   |
| O3—Sm1—O2               | 74.95 (15)  | O7—Sm1—O2 <sup>i</sup> | 84.9 (2)    |
| O3—Sm1—O2 <sup>i</sup>  | 78.36 (17)  | O7—Sm1—O2              | 138.74 (18) |
| O4—Sm1—O1               | 132.13 (19) | O7—Sm1—O3              | 127.63 (18) |
| O4—Sm1—O2               | 122.22 (17) | O7—Sm1—O4              | 75.37 (18)  |
| O4—Sm1—O2 <sup>i</sup>  | 80.14 (19)  | O7—Sm1—O5              | 98.9 (2)    |
| O4—Sm1—O3               | 53.12 (16)  | O7—Sm1—O6              | 78.3 (2)    |
| O5—Sm1—O1               | 76.0 (2)    | O8—Sm1—O1              | 81.7 (2)    |
| O5—Sm1—O2 <sup>i</sup>  | 152.76 (18) | O8—Sm1—O2 <sup>i</sup> | 79.3 (2)    |
| O5—Sm1—O2               | 120.99 (19) | O8—Sm1—O2              | 71.81 (19)  |
| O5—Sm1—O3               | 78.09 (18)  | O8—Sm1—O3              | 145.46 (19) |
| O5—Sm1—O4               | 74.8 (2)    | O8—Sm1—O4              | 145.7 (2)   |
| O6—Sm1—O1               | 72.9 (2)    | O8—Sm1—O5              | 127.9 (2)   |
| O6—Sm1—O2 <sup>i</sup>  | 153.71 (17) | O8—Sm1—O6              | 77.1 (2)    |
| O6—Sm1—O2               | 117.29 (19) | O8—Sm1—O7              | 75.7 (2)    |

O6—Sm1—O3                      127.93 (17)

---

Symmetry code(s): (i)  $-x+1, -y+1, -z+2$ .

**Table S7. Selected Bond lengths (Å) for MOF 4.**

|                     |           |                      |           |
|---------------------|-----------|----------------------|-----------|
| Eu1—O1W             | 2.346 (6) | Eu1—O6               | 2.461 (7) |
| Eu1—O4              | 2.402 (6) | Eu1—O1 <sup>i</sup>  | 2.483 (6) |
| Eu1—O2W             | 2.406 (6) | Eu1—O3 <sup>ii</sup> | 2.490 (6) |
| Eu1—O5              | 2.439 (7) | Eu1—O4 <sup>ii</sup> | 2.635 (6) |
| Eu1—O2 <sup>i</sup> | 2.440 (5) |                      |           |

---

Symmetry code(s): (i)  $x+1, y, z$ ; (ii)  $-x+2, -y+1, -z+1$ .

**Table S8. Selected Bond angles (Å) for MOF 4.**

|                         |            |                                       |             |
|-------------------------|------------|---------------------------------------|-------------|
| O1W—Eu1—O4              | 84.8 (2)   | O5—Eu1—O1 <sup>i</sup>                | 74.3 (2)    |
| O1W—Eu1—O2W             | 76.1 (2)   | O2 <sup>i</sup> —Eu1—O1 <sup>i</sup>  | 53.24 (18)  |
| O4—Eu1—O2W              | 79.3 (2)   | O6—Eu1—O1 <sup>i</sup>                | 114.3 (2)   |
| O1W—Eu1—O5              | 98.9 (3)   | O1W—Eu1—O3 <sup>ii</sup>              | 147.1 (2)   |
| O4—Eu1—O5               | 152.6 (2)  | O4—Eu1—O3 <sup>ii</sup>               | 114.61 (19) |
| O2W—Eu1—O5              | 128.0 (2)  | O2W—Eu1—O3 <sup>ii</sup>              | 81.6 (2)    |
| O1W—Eu1—O2 <sup>i</sup> | 127.3 (2)  | O5—Eu1—O3 <sup>ii</sup>               | 76.3 (2)    |
| O4—Eu1—O2 <sup>i</sup>  | 78.46 (19) | O2 <sup>i</sup> —Eu1—O3 <sup>ii</sup> | 84.1 (2)    |

|                         |             |                                        |             |
|-------------------------|-------------|----------------------------------------|-------------|
| O2W—Eu1—O2 <sup>i</sup> | 145.5 (2)   | O6—Eu1—O3 <sup>ii</sup>                | 73.2 (2)    |
| O5—Eu1—O2 <sup>i</sup>  | 77.8 (2)    | O1 <sup>i</sup> —Eu1—O3 <sup>ii</sup>  | 132.1 (2)   |
| O1W—Eu1—O6              | 78.2 (3)    | O1W—Eu1—O4 <sup>ii</sup>               | 138.7 (2)   |
| O4—Eu1—O6               | 152.98 (19) | O4—Eu1—O4 <sup>ii</sup>                | 64.4 (2)    |
| O2W—Eu1—O6              | 76.4 (2)    | O2W—Eu1—O4 <sup>ii</sup>               | 71.9 (2)    |
| O5—Eu1—O6               | 52.4 (2)    | O5—Eu1—O4 <sup>ii</sup>                | 121.3 (2)   |
| O2 <sup>i</sup> —Eu1—O6 | 128.6 (2)   | O2 <sup>i</sup> —Eu1—O4 <sup>ii</sup>  | 74.87 (18)  |
| O1W—Eu1—O1 <sup>i</sup> | 74.9 (2)    | O6—Eu1—O4 <sup>ii</sup>                | 117.6 (2)   |
| O4—Eu1—O1 <sup>i</sup>  | 80.6 (2)    | O1 <sup>i</sup> —Eu1—O4 <sup>ii</sup>  | 122.23 (19) |
| O2W—Eu1—O1 <sup>i</sup> | 145.9 (2)   | O3 <sup>ii</sup> —Eu1—O4 <sup>ii</sup> | 50.24 (18)  |

---

Symmetry code(s): (i)  $x+1, y, z$ ; (ii)  $-x+2, -y+1, -z+1$ .

**Table S9.** Selected Bond lengths (Å) for MOF 5.

|         |           |                      |           |
|---------|-----------|----------------------|-----------|
| O1—Tb1  | 2.415 (9) | O4—Tb1               | 2.413 (7) |
| O2—Tb1  | 2.449 (9) | O5—Tb1 <sup>i</sup>  | 2.458 (8) |
| O1W—Tb1 | 2.329 (8) | O6—Tb1               | 2.366 (8) |
| O3—Tb1  | 2.457 (8) | O6—Tb1 <sup>ii</sup> | 2.628 (8) |
| O2W—Tb1 | 2.378 (9) |                      |           |

---

Symmetry code(s): (i)  $-x+2, -y, -z+2$ ; (ii)  $-x+1, -y, -z+2$ .

**Table S10.** Selected Bond angles (Å) for MOF 5.

|                          |           |                                       |           |
|--------------------------|-----------|---------------------------------------|-----------|
| Tb1—O6—Tb1 <sup>ii</sup> | 116.4 (3) | O4—Tb1—O3                             | 53.8 (3)  |
| O1W—Tb1—O6               | 85.3 (3)  | O1—Tb1—O3                             | 74.2 (3)  |
| O1W—Tb1—O2W              | 75.8 (3)  | O2—Tb1—O3                             | 114.6 (3) |
| O6—Tb1—O2W               | 78.4 (3)  | O1W—Tb1—O5 <sup>i</sup>               | 146.6 (3) |
| O1W—Tb1—O4               | 127.8 (3) | O6—Tb1—O5 <sup>i</sup>                | 114.3 (3) |
| O6—Tb1—O4                | 78.7 (3)  | O2W—Tb1—O5 <sup>i</sup>               | 81.7 (3)  |
| O2W—Tb1—O4               | 145.1 (3) | O4—Tb1—O5 <sup>i</sup>                | 84.0 (3)  |
| O1W—Tb1—O1               | 98.7 (4)  | O1—Tb1—O5 <sup>i</sup>                | 76.5 (3)  |
| O6—Tb1—O1                | 152.6 (3) | O2—Tb1—O5 <sup>i</sup>                | 73.1 (3)  |
| O2W—Tb1—O1               | 128.9 (3) | O3—Tb1—O5 <sup>i</sup>                | 132.6 (3) |
| O4—Tb1—O1                | 77.5 (3)  | O1W—Tb1—O6 <sup>ii</sup>              | 138.7 (3) |
| O1W—Tb1—O2               | 77.7 (4)  | O6—Tb1—O6 <sup>ii</sup>               | 63.6 (3)  |
| O6—Tb1—O2                | 152.5 (3) | O2W—Tb1—O6 <sup>ii</sup>              | 71.9 (3)  |
| O2W—Tb1—O2               | 76.5 (3)  | O4—Tb1—O6 <sup>ii</sup>               | 74.5 (3)  |
| O4—Tb1—O2                | 128.8 (3) | O1—Tb1—O6 <sup>ii</sup>               | 121.5 (3) |
| O1—Tb1—O2                | 53.1 (3)  | O2—Tb1—O6 <sup>ii</sup>               | 117.8 (3) |
| O1W—Tb1—O3               | 74.8 (3)  | O3—Tb1—O6 <sup>ii</sup>               | 122.1 (3) |
| O6—Tb1—O3                | 80.9 (3)  | O5 <sup>i</sup> —Tb1—O6 <sup>ii</sup> | 50.6 (3)  |
| O2W—Tb1—O3               | 145.2 (3) |                                       |           |

---

Symmetry code(s): (i)  $-x+2, -y, -z+2$ ; (ii)  $-x+1, -y, -z+2$ .

**Table S11.** Hydrogen bonding parameters of MOF 1

| $D-H\cdots A$                | $D-H$ (Å) | $H\cdots A$ (Å) | $D\cdots A$ (Å) | $D-H\cdots A$ (°) |
|------------------------------|-----------|-----------------|-----------------|-------------------|
| O1W--H1WA..O5 <sup>i</sup>   | 0.82      | 1.89            | 2.6898(1)       | 172               |
| O1W--H1WB..N1 <sup>iv</sup>  | 0.82      | 1.88            | 2.9236(1)       | 167               |
| O2W--H2WA..O3 <sup>ii</sup>  | 0.81      | 2.20            | 2.9236(1)       | 148               |
| O2W--H2WB..O1 <sup>iii</sup> | 0.81      | 2.39            | 2.9593(1)       | 128               |
| O2W--H2WB..O1 <sup>iii</sup> | 0.81      | 2.41            | 3.0257(1)       | 133               |

Symmetry code(s): (i) 1+x,y,z ; (ii) 1-x,-y,1-z; (iii) -x,-y,1-z; (iv) 1-x,-y,2-z.

**Table S12.** Hydrogen bonding parameters of MOF 2

| $D-H\cdots A$                 | $D-H$ (Å) | $H\cdots A$ (Å) | $D\cdots A$ (Å) | $D-H\cdots A$ (°) |
|-------------------------------|-----------|-----------------|-----------------|-------------------|
| O1W --H1W ..N1 <sup>iii</sup> | 0.82      | 1.88            | 2.6931(1)       | 169               |
| O1W --H1WB..O3 <sup>i</sup>   | 0.82      | 1.89            | 2.7047(1)       | 175               |
| O2W --H2WA..O1 <sup>ii</sup>  | 0.82      | 2.17            | 2.9462(1)       | 158               |
| O2W--H2WA..O6 <sup>ii</sup>   | 0.82      | 2.45            | 2.9343(1)       | 118               |

Symmetry code(s): (i) -1+x,y,z ;(ii) -x,-y,1-z; (iii) -x,-y,-z.

**Table S13.** Hydrogen bonding parameters of MOF 3

| $D-H\cdots A$                    | $D-H$ (Å) | $H\cdots A$ (Å) | $D\cdots A$ (Å) | $D-H\cdots A$ (°) |
|----------------------------------|-----------|-----------------|-----------------|-------------------|
| O(7)--H(7A)..O(5) <sup>i</sup>   | 0.85      | 1.90            | 2.7158(1)       | 161               |
| O(7 --H(7B)..N(1) <sup>ii</sup>  | 0.85      | 2.16            | 2.6980(1)       | 121               |
| O(8) --H(8B)..O(2) <sup>ii</sup> | 0.85      | 2.60            | 2.9613(1)       | 107               |
| O(8) --H(8B)..O(3) <sup>i</sup>  | 0.85      | 2.10            | 2.9080(1)       | 160               |

Symmetry code(s): (i) 1+x,y,z; (ii) 1+x,y,1+z.

**Table S14.** Hydrogen bonding parameters of MOF 4

| $D-H\cdots A$                 | $D-H$ (Å) | $H\cdots A$ (Å) | $D\cdots A$ (Å) | $D-H\cdots A$ (°) |
|-------------------------------|-----------|-----------------|-----------------|-------------------|
| O1W--H1WA ..N1 <sup>iv</sup>  | 0.82      | 1.90            | 2.6904(1)       | 162               |
| O1W--H1WB..O5 <sup>i</sup>    | 0.82      | 1.91            | 2.7992(1)       | 173               |
| O2W--H2WA ..O2 <sup>iii</sup> | 0.81      | 2.31            | 2.9069(1)       | 131               |
| O2W --H2WB ..O3 <sup>ii</sup> | 0.81      | 2.26            | 2.9635(1)       | 144               |
| O2W--H2WB..O3 <sup>iii</sup>  | 0.82      | 2.26            | 2.9498          | 143               |

Symmetry code(s): (i) 1+x,y,z; (ii) 1-x,-y,1-z; (iii) 2-x,-y,1-z; (iv) 2-x,-y,2-z.

**Table S15.** Hydrogen bonding parameters of MOF 5

| $D-H\cdots A$                | $D-H$ (Å) | $H\cdots A$ (Å) | $D\cdots A$ (Å) | $D-H\cdots A$ (°) |
|------------------------------|-----------|-----------------|-----------------|-------------------|
| O1W--H1WA ..O1 <sup>ii</sup> | 0.82      | 1.91            | 2.7189(1)       | 171               |
| O1W--H1WB..N1 <sup>iii</sup> | 0.82      | 1.87            | 2.6818(1)       | 172               |
| O2W--H2WA..O6 <sup>i</sup>   | 0.82      | 2.32            | 2.9461(1)       | 133               |
| O2W --H2WB..O5 <sup>ii</sup> | 0.81      | 2.31            | 2.9566(1)       | 137               |
| O2W--H2WB..O4 <sup>i</sup>   | 0.81      | 2.23            | 2.8844(1)       | 137               |

Symmetry code(s): (i) 1-x,-y,2-z; (ii) -1+x,y,z; (iii) 1-x,-y,1-z .

#### 4. Previous MOF-based sensors for Pb<sup>2+</sup> detection Table

**Table S16** Comparison of Quenching Efficiencies with previously reported literature.

| MOF                                                                                                                    | Stern -Volmer Constant (K <sub>sv</sub> )L/mol | Analyte          | Ref. |
|------------------------------------------------------------------------------------------------------------------------|------------------------------------------------|------------------|------|
| [Eu <sub>2</sub> (FDC) <sub>3</sub> DMA(H <sub>2</sub> O) <sub>3</sub> ].DMA.4.5H <sub>2</sub> O                       | 2.97×10 <sup>3</sup>                           | Pb <sup>2+</sup> | 4    |
| [Cd <sub>3</sub> (5-NH <sub>2</sub> -mdc) <sub>3</sub> (Bipy) <sub>3</sub> .H <sub>2</sub> O] <i>n</i>                 | 9.970 × 10 <sup>3</sup>                        | Pb <sup>2+</sup> | 5    |
| {[(CH <sub>3</sub> ) <sub>2</sub> NH <sub>2</sub> ] <sub>3</sub> (In <sub>3</sub> L <sub>4</sub> )}·(solvent) <i>x</i> | 9.78 × 10 <sup>3</sup>                         | Pb <sup>2+</sup> | 6    |
| NH <sub>2</sub> -MIL-53(Cr)                                                                                            | 7.48 × 10 <sup>3</sup>                         | Pb <sup>2+</sup> | 7    |

|                                                                     |                      |                  |           |
|---------------------------------------------------------------------|----------------------|------------------|-----------|
| [Zn(HL <sub>2</sub> )(bipy)0.5(H <sub>2</sub> O)]·2H <sub>2</sub> O | 1.18×10 <sup>4</sup> | Pb <sup>2+</sup> | 8         |
| This work                                                           | 8.90×10 <sup>3</sup> | Pb <sup>2+</sup> | This work |
| This work                                                           | 5.47×10 <sup>4</sup> | Pb <sup>2+</sup> | This work |

### 5. Stern -Volmer Constants, Quenching Efficiencies and LODs Table

**Table S17** Stern -Volmer Constants, Quenching Efficiencies and LODs Tables

| CP-4 with Heavy metal analyte | Stern -Volmer Constant (K <sub>sv</sub> ) L/mol | Quenching Efficiency (%) | LOD(ppm) |
|-------------------------------|-------------------------------------------------|--------------------------|----------|
| Pb <sup>2+</sup>              | 8.90 ×10 <sup>3</sup>                           | 74.5%                    | 0.014    |
| Cd <sup>2+</sup>              | 2.79 ×10 <sup>3</sup>                           | 54.00%                   | 0.069    |
| Hg <sup>2+</sup>              | 1.92 ×10 <sup>3</sup>                           | 54.35%                   | 0.20     |
| Mn <sup>2+</sup>              | 8.91×10 <sup>2</sup>                            | 53.95%                   | 1.03     |
| Ni <sup>2+</sup>              | 2.38×10 <sup>2</sup>                            | 53.24%                   | 1.15     |

| CP-5 with Heavy metal analyte | Stern -Volmer Constant (K <sub>sv</sub> ) L/mol | Quenching Efficiency (%) | LOD(ppm) |
|-------------------------------|-------------------------------------------------|--------------------------|----------|
| Pb <sup>2+</sup>              | 5.47×10 <sup>4</sup>                            | 95.1%                    | 0.013    |
| Hg <sup>2+</sup>              | 1.62×10 <sup>4</sup>                            | 86.39%                   | 0.098    |
| Ni <sup>2+</sup>              | 3.65×10 <sup>2</sup>                            | 63.49%                   | 1.23     |
| Cd <sup>2+</sup>              | 3.12×10 <sup>3</sup>                            | 57.49%                   | 1.29     |
| Mn <sup>2+</sup>              | 1.31×10 <sup>3</sup>                            | 52.37%                   | 2.12     |

### References:

1. C. Li, T. Chen, W. Xu, X. Lou, L. Pan, Q. Chen and B. Hu, *J. Mater. Chem. A*, 2015, **3**, 5585–5591.
2. L. Peng, J. Zhang, Z. Xue, B. Han, J. Li and G. Yang, *Chem. Commun.*, 2013, **49**, 11695.
3. V. I. Isaeva, E. V. Belyaeva, A. N. Fitch, V. V. Chernyshev, S. N. Klyamkin, and L. M. Kustov, *Cryst. Growth Des.* 2013, **13**, 5305–5315.
4. L. Li, Q. Chen, Z. Niu, X. Zhou, T. Yang and W. Huang, *J. Mater. Chem. C*, 2016, **4**, 1900-1905.
5. K.A.Nartey, X.Wang, J. Zhang and J. Hu, *Opt. Mater.*, 2021, **119**, 111327.
6. Q. Li, B. Guan, W. Zhu, T. Liu, L. Chen, Y. Wang and D. Xue, *J. Solid State Chem.*, 2020, **291**, 121672.



7. H. Guo, D. Wang, J. Chen, W. Weng, M. Huang and Z. Zheng, *Chem. Eng. J.*, 2016, **289** 479-485.
8. J.X. Hou, J.P. Gao, J. Liu, X. Jing, L. J. Li and J.L. Du, *Dyes Pigm.*, 2019, **160**, 159-164.
